# Supplementary material for: Selenium Deficiency Is Associated with Pro-longevity Mechanisms
Source: PubMed Central journal article supplement — Cell Rep. Author manuscript; Available in PMC 2019 Aug 11. (PMC6689410; doi:10.1016/j.celrep.2019.05.001), 2019-05-28
Supplement: NIHMS1530453-supplement-1.pdf [file NIHMS1530453-supplement-1.pdf]

**Cell Reports, Volume 27**

**Supplemental Information**

**Selenium Deficiency Is Associated  
with Pro-longevity Mechanisms**

**Sun Hee Yim, Clary B. Clish, and Vadim N. Gladyshev**

## SUPPLEMENTAL INFORMATION

### SUPPLEMENTAL FIGURES

**Figure S1.** Effect of Se diets on mouse liver and brain metabolomes. Related to Figure 2, Figure S2, Tables S1 and S2, and File S1.

**Figure S2.** Metabolites and metabolic pathways altered in response to Se deficiency and toxicity in liver (A) and brain (B). Related to Figures 2 - 5, Figures S1 and S3, Tables S1 and S2, and File S1.

**Figure S3.** Selenoprotein gene expression in response to Se diets. Related to Figure 6, Figure S4, and File S2.

**Figure S4.** Regulation of gene expression by dietary Se in liver (A) and brain (B). Related to Figure 6, Figure S3, and File S2.

**Figure S5.** Nrf2 target analysis. NQO1 and HO-1 protein levels and mRNA expression in response to Se diets (A) and Nrf2 target gene set enrichment analysis (GSEA) in liver and brain of mice subjected to Se diets (B). Related to Figure 6 and File S2.

**Figure S6.** Dietary Se regulates miRNA expression in liver. Related to Figure 6, Table S3, and File S3.

### SUPPLEMENTAL TABLES

**Table S1.** Commonly enriched metabolic pathways in brain and liver in response to selenium diets ( $p < 0.05$ ) (A) and ( $p < 0.01$ ) (B). Related to Figures 2 and 3, Figures S1 and S3, and File S1.

**Table S2.** Metabolites associated with selenium deficiency in liver. Related to Figure 5, Figure S1 and S2, and File S1.

**Table S3.** microRNAs differentially expressed in response to selenium diets. Related to Figure 6, Figure S6, and File S3.

### SUPPLEMENTAL FILES (SEPARATE EXCEL FILES)

**File S1.** Metabolite profiling data. Related to Figures 2-5, Figures S1 and S2, and Tables S1 and S2.

**File S2.** Transcriptome data. Related to Figure 6 and Figures S3-S5.

**File S3.** miRNA data. Related to Figure 6, Figure S6, and Table S3.

**SUPPLEMENTAL FIGURES**

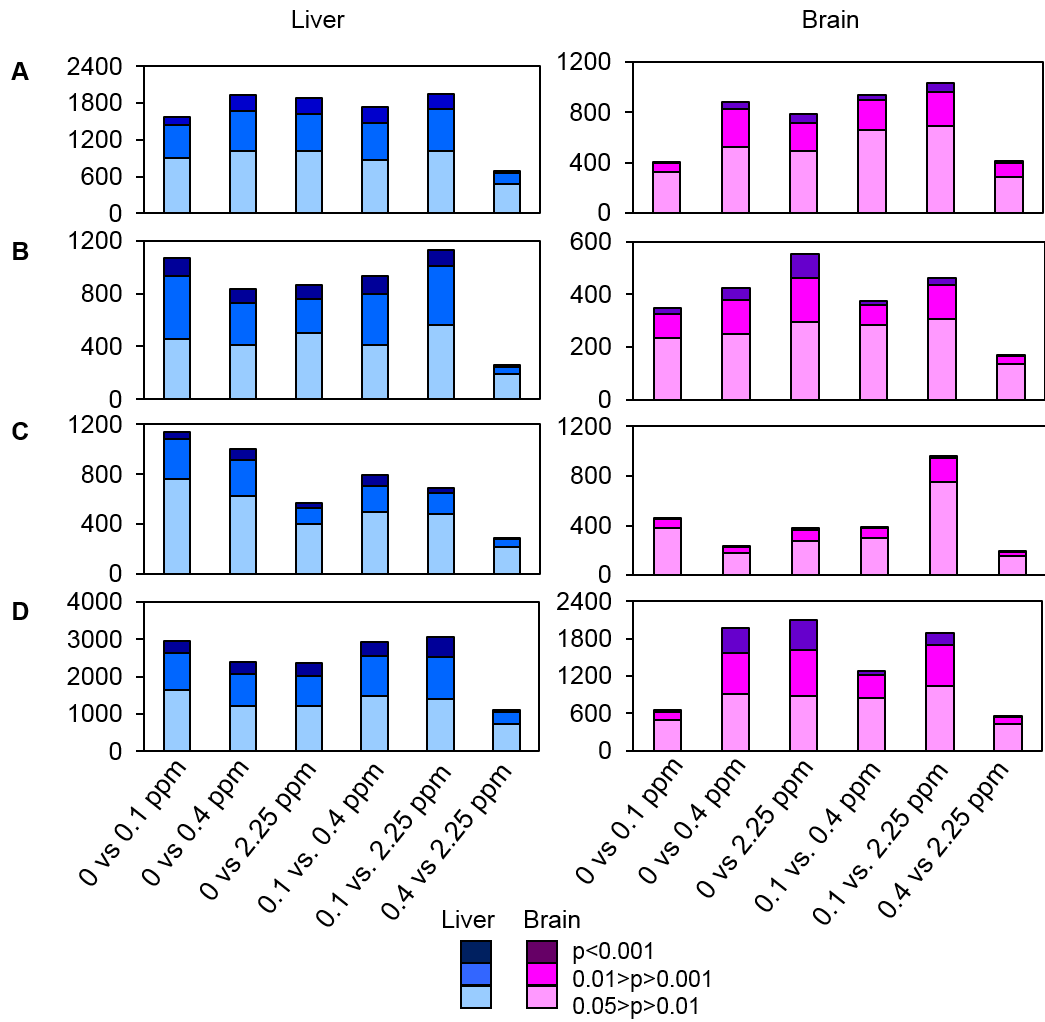

**E**

| Targeted metabolite       | 0 vs. (0.1 or 0.4) ppm |       | 2.25 vs. (0.1 or 0.4) ppm |       |
|---------------------------|------------------------|-------|---------------------------|-------|
|                           | Liver                  | Brain | Liver                     | Brain |
| <b>TTEST</b>              |                        |       |                           |       |
| <b>p&lt;0.001</b>         | 25                     | 1     | 1                         | 2     |
| <b>0.001&lt;p&lt;0.01</b> | 74                     | 5     | 20                        | 3     |
| <b>0.01&lt;p&lt;0.05</b>  | 87                     | 8     | 41                        | 20    |

  

| Non-targeted metabolite   | 0 vs. (0.1 or 0.4) ppm |       | 2.25 vs. (0.1 or 0.4) ppm |       |
|---------------------------|------------------------|-------|---------------------------|-------|
|                           | Liver                  | Brain | Liver                     | Brain |
| <b>TTEST</b>              |                        |       |                           |       |
| <b>p&lt;0.001</b>         | 1035                   | 181   | 319                       | 59    |
| <b>0.001&lt;p&lt;0.01</b> | 2129                   | 814   | 1061                      | 441   |
| <b>0.01&lt;p&lt;0.05</b>  | 2980                   | 1616  | 2525                      | 1434  |

**Figure S1. Effect of Se diets on mouse liver and brain metabolomes. Related to Figure 2, Figure S2, Tables S1 and S2, and File S1.**

Fractions of significant metabolites that represents the numbers of metabolites with altered levels detected in each comparison. Note that the four metabolite profiling platforms (**A**, **B**, **C**, and **D**) detect different numbers of features. The Y-axis corresponds to the number of features detected. (**E**) Number of metabolites that are altered in the comparisons of dietary groups with indicated statistical significance are shown. Targeted metabolites (upper table) and non-targeted metabolite (lower table) from all four metabolite profiling platforms in both liver and brain are summarized.

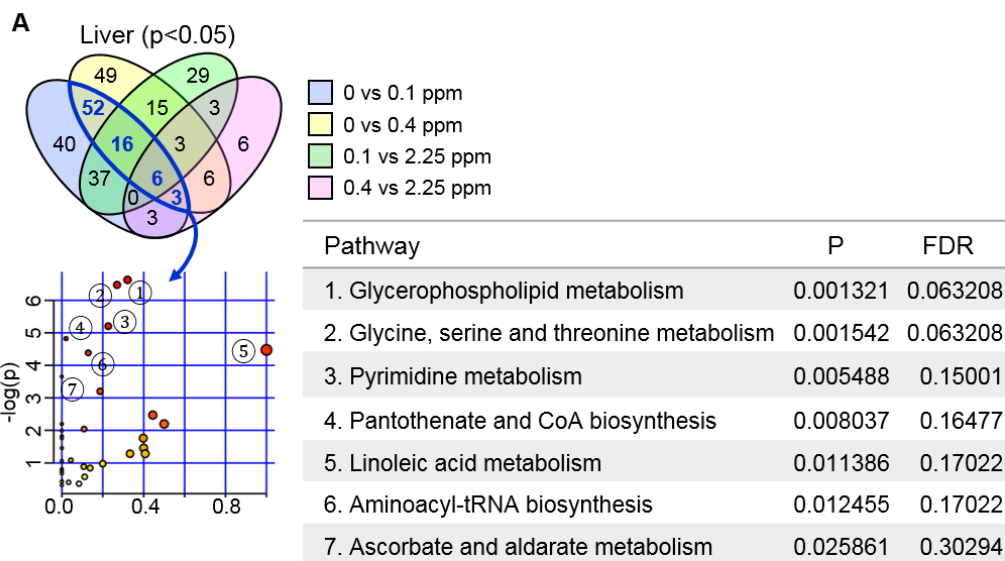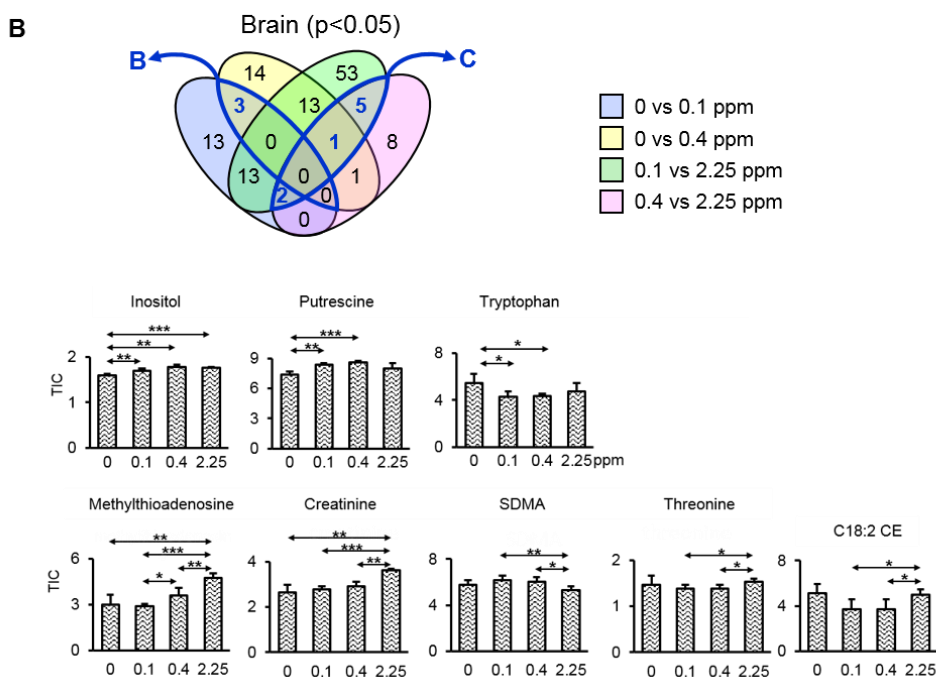

**Figure S2. Metabolites and metabolic pathways altered in response to Se deficiency and toxicity in liver (A) and brain (B). Related to Figures 2 - 5, Figures S1 and S3, Tables S1 and S2, and File S1.**

(A) Metabolites associated with Se deficiency (0 vs 0.1 ppm, and 0 vs 0.4 ppm) and Se toxicity (0.1 vs. 2.25 ppm, and 0.4 vs. 2.25 ppm) with  $p < 0.05$ . Metabolites associated with Se deficiency were quantified and enriched pathways were assessed using MetaboAnalyst 4.0. (B) Three metabolites (inositol, putrescine, and tryptophan) were altered in response to Se deficiency. Eight metabolites were commonly altered in response to Se toxicity (0.1 vs 2.25 ppm and 0.4 vs 2.25 ppm). In addition to the metabolites shown in Figure S2B, methionine sulfoxide, 5-adenosylhomocysteine, and methionine were also altered by Se toxicity (Figure 3A). TIC represents total ion count.

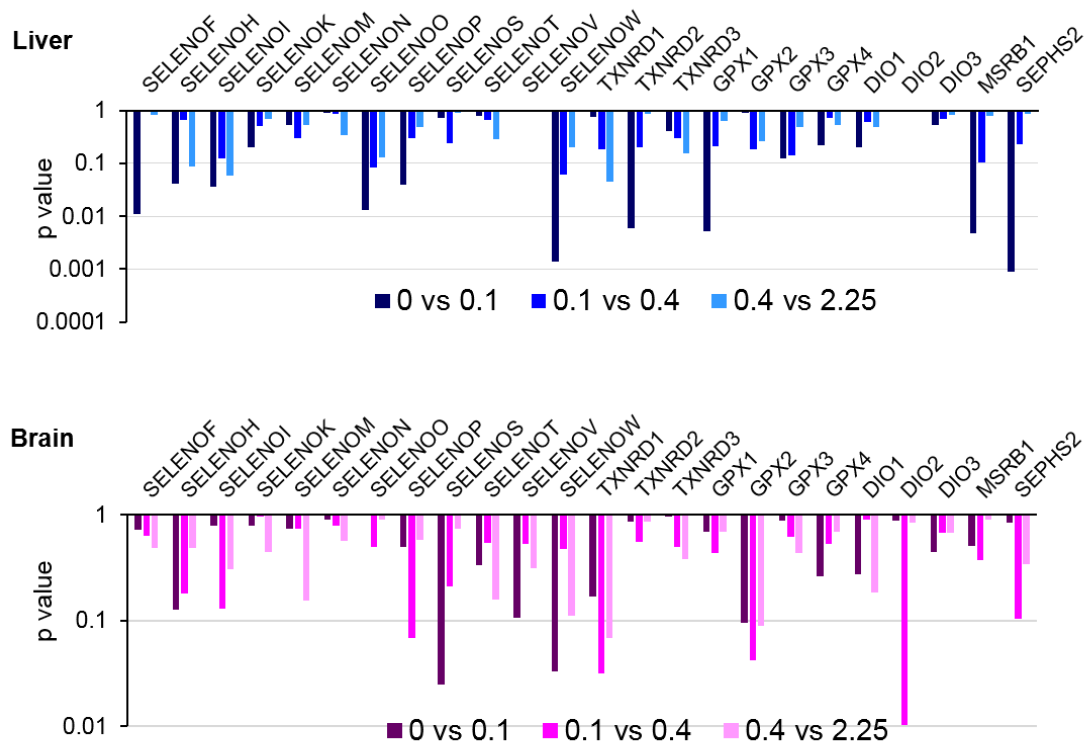

**Figure S3. Selenoprotein gene expression in response to Se diets. Related to Figure 6, Figure S4, and File S2.**

Selenoprotein transcript expression was assessed by the comparison between 0 vs 0.1, 0.1 vs 0.4, and 0.4 vs 2.25 ppm diets. Upper panel shows significance for the liver, and lower panel for the brain. The Y-axis shows p values of Student t-test. Selenoprotein transcripts in liver were more significantly modified by dietary Se than in brain.

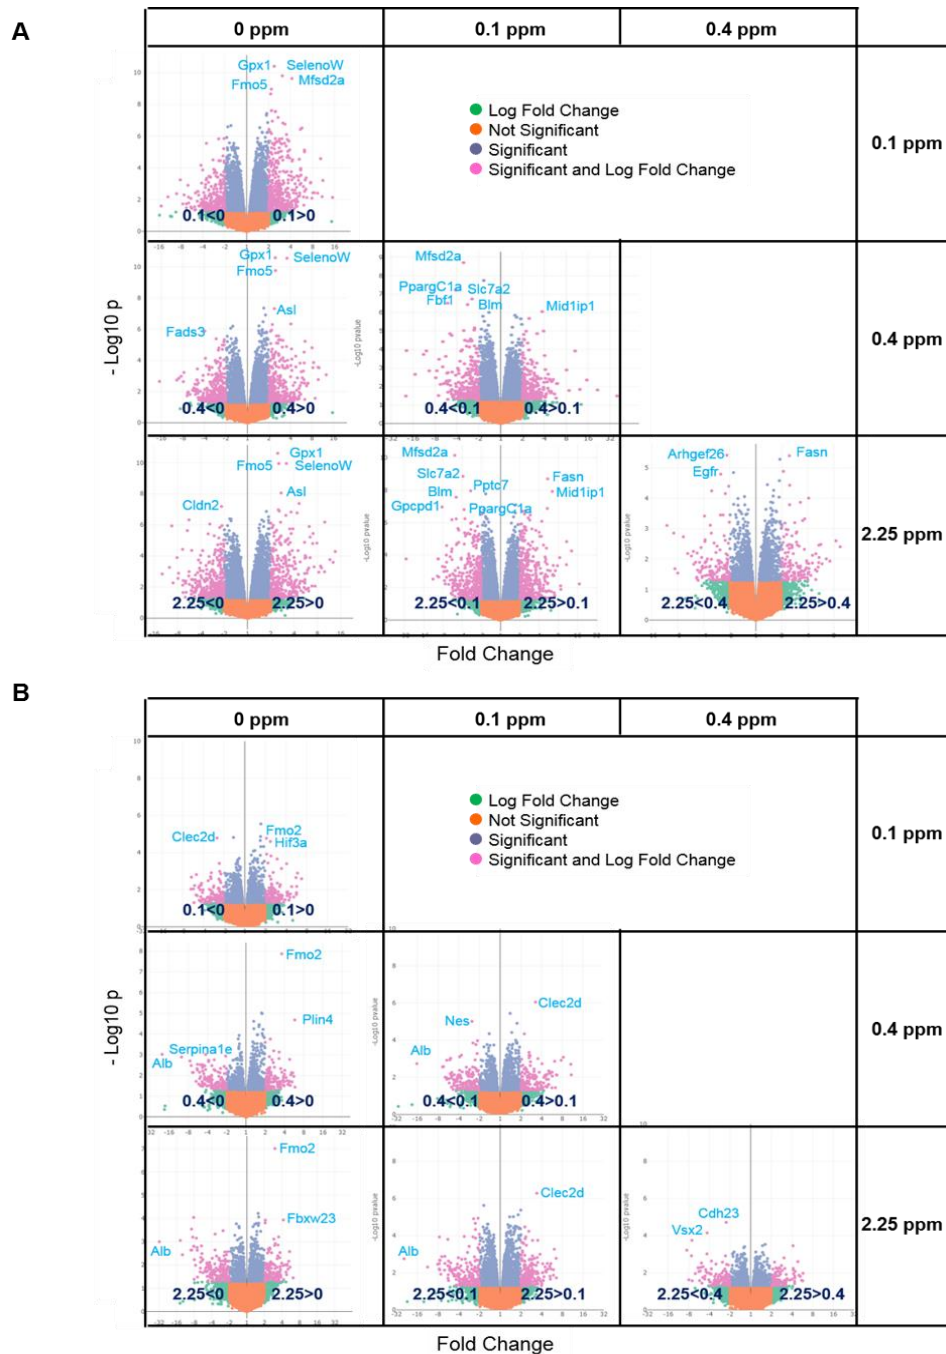

**Figure S4. Regulation of gene expression by dietary Se in liver (A) and brain (B). Related to Figure 6, Figure S3, and File S2.**

(A) Volcano plots of RNAseq data (in triplicate) showing the overall view on how gene expression is affected by Se diets in liver. The X-axis shows log fold changes and the Y-axis  $-\log p$  values. Pink dots represent the transcripts that are significant in both p-value and fold change. Some significant transcripts are indicated on the plot in blue. (B) Volcano plots of RNAseq data (in triplicate) showing the overall view on how gene expression is affected by Se diets in brain. The X-axis shows log fold changes and the Y-axis  $-\log p$ -values. Pink dots represent the transcripts that are significant in both p-value and fold change. Some significant transcripts are indicated on the plot in blue.

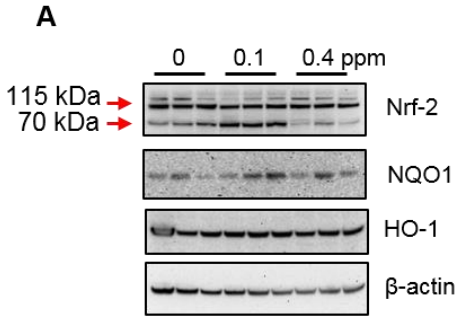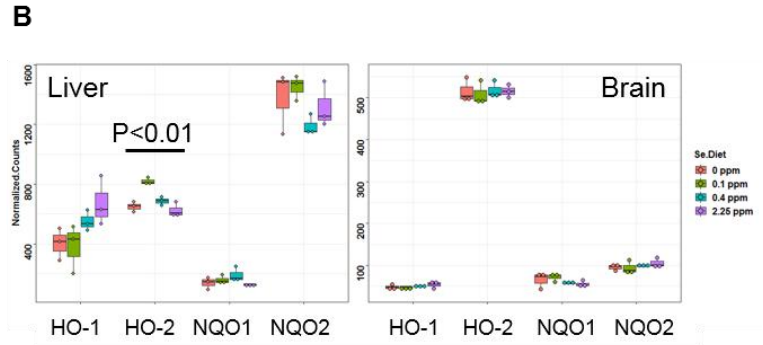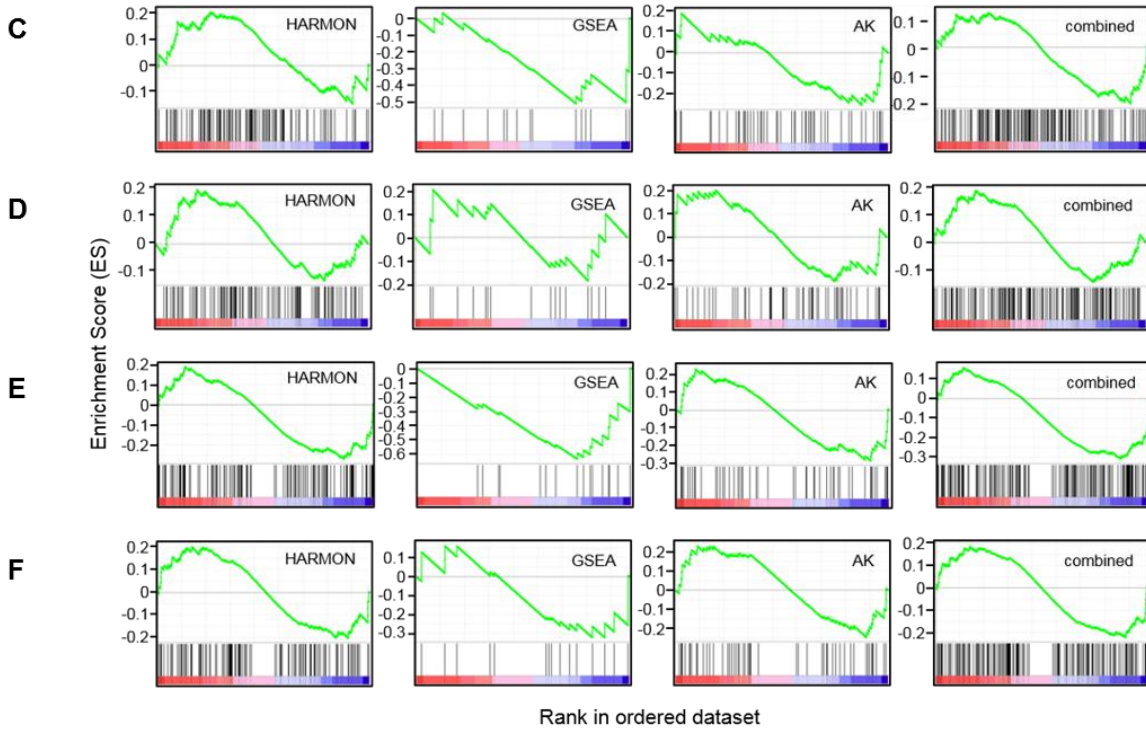

**G**

|                 | A. Brain (0 vs 0.1 ppm) |       |       |              | B. Brain (0 vs 0.4 ppm) |       |       |              |
|-----------------|-------------------------|-------|-------|--------------|-------------------------|-------|-------|--------------|
|                 | HARMON                  | GSEA  | AK    | combined     | HARMON                  | GSEA  | AK    | combined     |
| ES              | 0.2                     | -0.51 | -0.25 | -0.21        | 0.19                    | 0.21  | 0.2   | 0.19         |
| NES             | 0.91                    | -1.21 | -0.91 | -1           | 0.81                    | 0.46  | 0.79  | 0.83         |
| Nominal p-value | 0.611                   | 0.101 | 0.516 | 0.393        | 0.591                   | 0.897 | 0.707 | 0.732        |
| FDR q-value     | 0.706                   | 0.204 | 0.608 | <b>0.494</b> | 0.697                   | 1     | 0.816 | <b>0.822</b> |

  

|                 | C. Liver (0 vs 0.1 ppm) |       |       |              | D. Liver (0 vs 0.4 ppm) |       |       |              |
|-----------------|-------------------------|-------|-------|--------------|-------------------------|-------|-------|--------------|
|                 | HARMON                  | GSEA  | AK    | combined     | HARMON                  | GSEA  | AK    | combined     |
| ES              | -0.27                   | -0.64 | -0.29 | -0.31        | -0.2                    | -0.32 | -0.25 | -0.22        |
| NES             | -1.1                    | -1.5  | -0.73 | -1.11        | -0.83                   | -1.02 | -0.61 | -0.83        |
| Nominal p-value | 0.306                   | 0     | 0.686 | 0.184        | 0.605                   | 0.384 | 0.906 | 0.719        |
| FDR q-value     | 0.4                     | 0.097 | 0.797 | <b>0.269</b> | 0.702                   | 0.471 | 1     | <b>0.819</b> |

Enrichment Score (ES), Normalized Enrichment Score (NES)



**Figure S5. Nrf2 target analysis. NQO1 and HO-1 protein levels and mRNA expression in response to Se diets (A) and Nrf2 target gene set enrichment analysis (GSEA) in liver and brain of mice subjected to Se diets (B). Related to Figure 6 and File S2.**

(A) Protein expression levels of Nrf2 and its downstream targets, NQO1 and HO-1, in livers of animals fed with diets containing 0, 0.1 and 0.4 ppm Se. Three animals per diet group were evaluated by Western blot analyses.  $\beta$ -actin served as a loading control. (B) Expression of Nrf2 target transcripts, HO-1 and NQO1, in the liver and brain of animals fed with diets containing 0, 0.1 0.4, and 2.25 ppm Se. Data were obtained from RNAseq analysis, and three animals per diet group were evaluated. (C-F) The mRNA expression data generated by RNAseq was analyzed using GSEA (<http://software.broadinstitute.org/gsea/index.jsp>) to test for Nrf2 target enrichment. Three Nrf2 target gene lists, HARMON ([https://amp.pharm.mssm.edu/Harmonizome/gene\\_set/nrf2/GeneRIF+Biological+Term+Annotations](https://amp.pharm.mssm.edu/Harmonizome/gene_set/nrf2/GeneRIF+Biological+Term+Annotations)), GSEA ([http://software.broadinstitute.org/gsea/msigdb/geneset\\_page.jsp?geneSetName=BIOCARTA\\_ARENRF2\\_PATHWAY](http://software.broadinstitute.org/gsea/msigdb/geneset_page.jsp?geneSetName=BIOCARTA_ARENRF2_PATHWAY)) and AK (Genes Nutr. 2010 5(4):297-307, PMID: 21189866) as well as the combined dataset were tested. In each panel, the green curve represents the evolution of density of genes identified in the RNAseq data. X-axis indicates rank in ordered dataset (among ~22,000 genes) and Y-axis shows enrichment score (ES) for genes in each gene set. Each barcode plot indicates the position of genes in each gene set; red and blue colors represent positive and negative Pearson correlation with the Nrf2 target gene expression, respectively. The FDR (false discovery rate) was calculated by comparing the Se diet RNAseq data with 2,500 Monte-Carlo permutations. The NES (Normalized enrichment score) computed the density of modified genes in the Nrf2 target gene lists with random expectancies. It was further normalized by the number of genes found in a given gene list (i.e. Harmon, GSEA, AK, or combined) to take into account the cluster size. (C) Comparison of 0 vs 0.1 ppm in the brain. Three Nrf2 target gene lists and the combined set are shown. The FDR of all Nrf2 combined gene is 0.494. (D) Comparison of 0 vs 0.4 ppm in the brain. Three Nrf2 target gene lists and the combined list are shown. The FDR of all Nrf2 combined gene is 0.822. (E) Comparison of 0 vs 0.1 ppm in the liver. Three Nrf2 target gene lists and the combined list are shown. The FDR of all Nrf2 combined gene is 0.269. (F) Comparison of 0 vs 0.4 ppm in the liver. Three Nrf2 target gene lists and the combined list are shown. The FDR of all Nrf2 combined gene is 0.819. (G) Statistics of the Nrf2 response to response to Se deficiency in liver and brain.

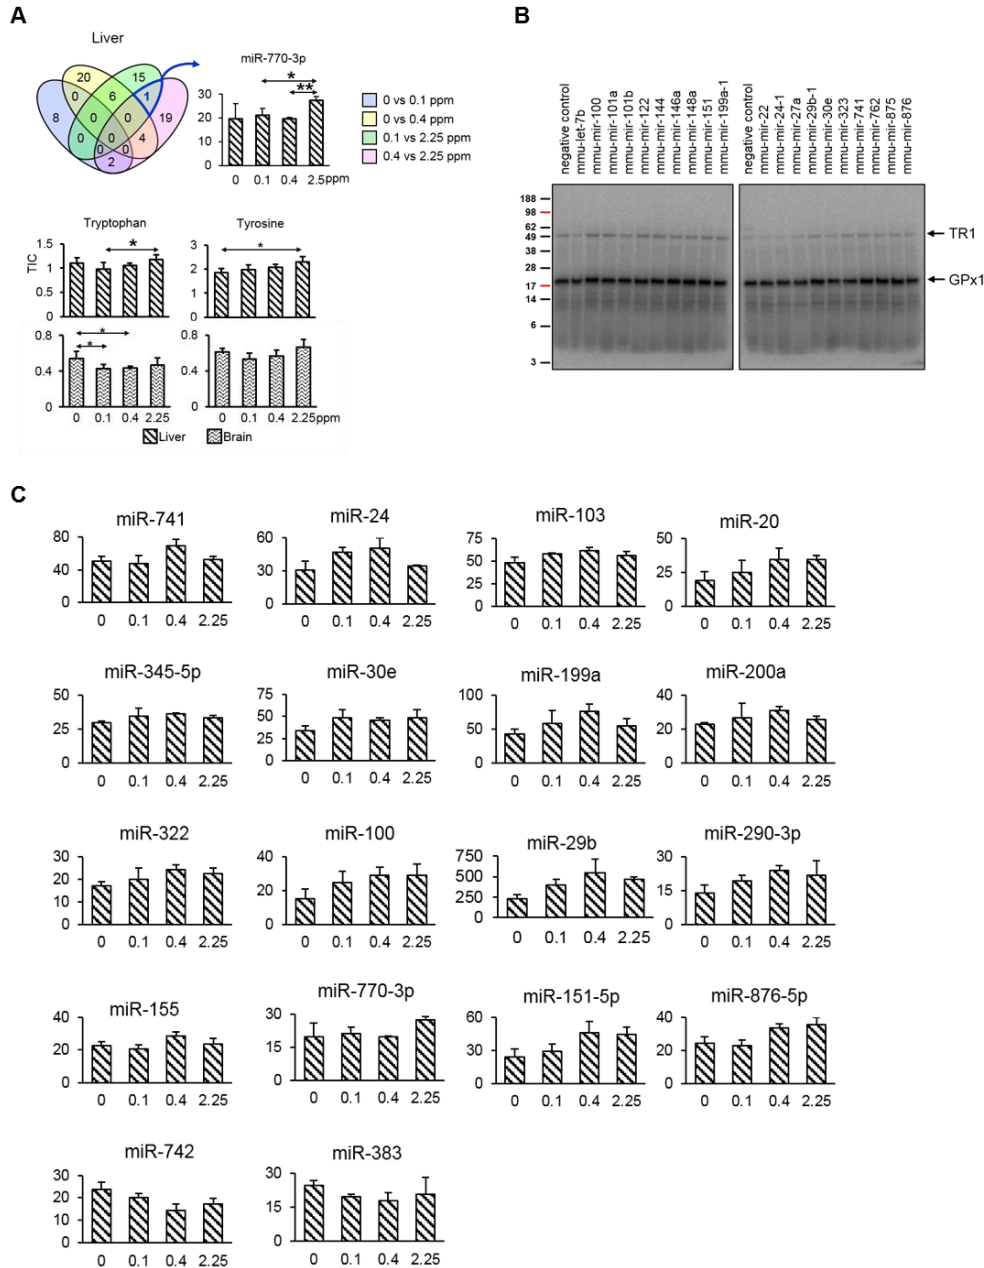

**Figure S6. Dietary Se regulates miRNA expression in liver. Related to Figure 6, Table S3, and File S3.**

(A) Ten miRNAs were found to be changed in the 0 vs 0.1 ppm comparison and 30 in the 0 vs 0.4 ppm comparison. Se toxicity altered 22 and 26 miRNAs relative to 0.4 ppm and 0.1 ppm samples, respectively. Expression of miR-770-3p was increased by Se toxicity which potentially target *Szrd1* (ENSMUSG00000040842), *Pttg1ip* (ENSMUSG00000009291), *Rbm14* (ENSMUSG00000006456), and (*MaoB*, ENSMUSG00000040147) that target tyrosine ( $p=2.2132E-10$ ) and tryptophan ( $p=2.8886E-04$ ). TIC represents total ion count. (B)  $^{75}\text{Se}$ -labeling patterns (representing selenoprotein expression) of mouse primary hepatocytes are shown which were provided with miRNA Hairpin inhibitors. Cells were labeled with  $^{75}\text{Se}$  for 24 h, proteins were separated by SDS-PAGE, and incorporation of  $^{75}\text{Se}$  was visualized with a PhosphorImager. Migration of two major liver selenoproteins, Txnrd1 (TR1) and GPx1, is indicated. (C) Differentially expressed miRNAs. miRNAs with altered expression in response to dietary Se, as assessed by NanoString nCounter miRNA expression assays, are shown. Data are shown in mean count  $\pm$  SD for three independent experiments. miRNAs that differed in at least one comparison are shown.

**SUPPLEMENTAL TABLES**

**Table S1. Commonly enriched metabolic pathways in brain and liver in response to selenium diets (p<0.05) (A) and (p<0.01) (B). Related to Figures 2 and 3, Figures S1 and S3, and File S1.**

(A) Targeted metabolite profiling method detected 335 metabolites in liver and 156 in brain that were altered in any concentration of dietary selenium. Among these, 114 metabolites were commonly altered in both liver and brain and further analyzed for metabolic pathway enrichment using MetaboAnalyst 4.0. Significantly enriched pathways (1<sup>st</sup> to 7<sup>th</sup>) are marked in the Figure 2E and listed. (B) Targeted metabolite profiling method detected 169 metabolites in liver and 46 in brain that were altered in any concentration of dietary selenium. Among these, 22 metabolites were commonly altered in both liver and brain and further analyzed for metabolic pathway enrichment using MetaboAnalyst 4.0. Significantly enriched pathways (1<sup>st</sup> to 5<sup>th</sup>) are listed.

| <b>A: PATHWAY (P&lt;0.05)</b>                       | <b>TOTAL</b> | <b>HITS</b> | <b>P</b> | <b>-LOG(P)</b> | <b>FDR</b> |
|-----------------------------------------------------|--------------|-------------|----------|----------------|------------|
| aminoacyl-trna biosynthesis ①                       | 69           | 13          | 2.78e-05 | 10.491         | 0.002279   |
| valine, leucine and isoleucine biosynthesis ②       | 11           | 4           | 0.001712 | 6.37           | 0.055661   |
| purine metabolism ③                                 | 68           | 10          | 0.002036 | 6.1966         | 0.055661   |
| alanine, aspartate and glutamate metabolism ④       | 24           | 5           | 0.006607 | 5.0196         | 0.12875    |
| nitrogen metabolism ⑤                               | 9            | 3           | 0.009151 | 4.6939         | 0.12875    |
| glutathione metabolism ⑥                            | 26           | 5           | 0.009421 | 4.6648         | 0.12875    |
| cysteine and methionine metabolism ⑦                | 27           | 5           | 0.011099 | 4.5009         | 0.13001    |
| lysine biosynthesis                                 | 4            | 2           | 0.015078 | 4.1945         | 0.15455    |
| pyrimidine metabolism                               | 41           | 6           | 0.017278 | 4.0583         | 0.15742    |
| glycine, serine and threonine metabolism            | 31           | 5           | 0.019841 | 3.92           | 0.1627     |
| arginine and proline metabolism                     | 44           | 6           | 0.023953 | 3.7317         | 0.17856    |
| beta-alanine metabolism                             | 17           | 3           | 0.054848 | 2.9032         | 0.3748     |
| biosynthesis of unsaturated fatty acids             | 42           | 5           | 0.063642 | 2.7545         | 0.40143    |
| <b>B: PATHWAY (P&lt;0.01)</b>                       | <b>TOTAL</b> | <b>HITS</b> | <b>P</b> | <b>-LOG(P)</b> | <b>FDR</b> |
| cysteine and methionine metabolism ①                | 27           | 3           | 0.004164 | 5.4813         | 0.19251    |
| ascorbate and aldarate metabolism ②                 | 9            | 2           | 0.005207 | 5.2577         | 0.19251    |
| valine, leucine and isoleucine biosynthesis ③       | 11           | 2           | 0.007837 | 4.849          | 0.19251    |
| aminoacyl-trna biosynthesis ④                       | 69           | 4           | 0.009391 | 4.668          | 0.19251    |
| starch and sucrose metabolism ⑤                     | 19           | 2           | 0.022941 | 3.7748         | 0.37623    |
| alanine, aspartate and glutamate metabolism         | 24           | 2           | 0.035665 | 3.3336         | 0.42172    |
| galactose metabolism                                | 26           | 2           | 0.041372 | 3.1851         | 0.42172    |
| inositol phosphate metabolism                       | 28           | 2           | 0.047404 | 3.049          | 0.42172    |
| phenylalanine, tyrosine and tryptophan biosynthesis | 4            | 1           | 0.049903 | 2.9977         | 0.42172    |
| purine metabolism                                   | 68           | 3           | 0.051429 | 2.9675         | 0.42172    |

**Table S2. Metabolites associated with selenium deficiency in liver. Related to Figure 5, Figure S1 and S2, and File S1.**

Sixty-three metabolites are altered in the comparison of 0 vs 0.1 ppm and 76 metabolites are altered in 0 vs 0.4 ppm. Among these, 25 metabolites are commonly altered in both comparisons with p value less than 0.01 (Figure 5A).

| HMDB      | COMPOUND NAME                           |
|-----------|-----------------------------------------|
| HMDB00696 | L-Methionine                            |
| HMDB00187 | L-Serine                                |
| HMDB00168 | L-Asparagine                            |
| HMDB00056 | Beta-Alanine                            |
| HMDB01185 | s-adenosylmethionine                    |
| HMDB29416 | L-Targinine                             |
| HMDB03337 | Oxidized glutathione                    |
| HMDB02005 | Methionine sulfoxide                    |
| HMDB01520 | Flavin Mononucleotide                   |
| HMDB00691 | Malonic acid                            |
| HMDB00300 | Uracil                                  |
| HMDB00157 | Hypoxanthine                            |
| HMDB01539 | ADMA                                    |
| HMDB01202 | dCMP                                    |
| HMDB10393 | LysoPC(20:3(5Z,8Z,11Z))                 |
| HMDB10382 | LysoPC(16:0)                            |
| HMDB11503 | LysoPE(16:0/0:0)                        |
| HMDB06726 | CE(20:4(5Z,8Z,11Z,14Z))                 |
| HMDB11504 | LysoPE(16:1(9Z)/0:0)                    |
| HMDB42105 | C53:3 TAG                               |
| HMDB05363 | TG(16:0/16:0/20:4(5Z,8Z,11Z,14Z))[iso3] |
| HMDB11130 | LysoPE(18:0/0:0)                        |
| HMDB08006 | PC(16:1(9Z)/18:2(9Z,12Z))               |
| HMDB05462 | C56:7 TAG                               |
| HMDB11507 | C18:2 LPE                               |

**Table S3. microRNAs differentially expressed in response to selenium diets. Related to Figure 6, Figure S6, and File S3.**

Comparisons are made with the Student t-test. All listed microRNAs are with  $p < 0.05$ , microRNAs with  $p < 0.01$  are marked ¶, microRNAs marked § are shown in the Figure S6.

| 0 vs 0.1 ppm | 0 vs 0.4ppm  | 0 vs 2.5 ppm | 0.1 vs 0.4 ppm | 0.1 vs 2.5 ppm  | 0.4 vs 2.5 ppm |
|--------------|--------------|--------------|----------------|-----------------|----------------|
| miR-1894-3p  | miR-452¶     | miR-1274a¶   | miR-667¶       | miR-466f-5p¶    | miR-770-3p§¶   |
| miR-222      | miR-450a-3p¶ | miR-29b§¶    | miR-669e¶      | miR-466j¶       | miR-713¶       |
| miR-767      | miR-345-5p§¶ | miR-1191¶    | miR-546¶       | miR-m108-2-5p.2 | miR-200c       |
| miR-29b§     | miR-M87-1    | miR-466j     | miR-296-3p¶    | miR-876-5p§     | miR-1963       |
| miR-383§     | miR-322§     | miR-M23-2    | miR-342-5p     | miR-1968        | miR-340-3p     |
| miR-666-3p   | miR-376b     | miR-669m     | miR-155§       | let-7b          | miR-10a        |
| miR-188-5p   | miR-433      | miR-466f-5p  | miR-582-5p     | miR-1966        | miR-450a-5p    |
| miR-327      | miR-713      | miR-151-5p§  | miR-452        | miR-323-3p      | miR-298        |
| miR-466f-5p  | miR-298      | miR-3072     | miR-199a-5p§   | miR-1224        | miR-210        |
| miR-615-3p   | miR-27a      | miR-1944     | miR-291a-5p    | miR-1192        | miR-615-5p     |
|              | miR-199a-3p§ | miR-297b-3p  | miR-876-5p§    | miR-743a        | miR-471        |
|              | miR-742§     | miR-15b      | miR-450a-3p    | miR-2133        | miR-188-3p     |
|              | miR-290-3p§  | miR-1929     | miR-297b-3p    | miR-1894-3p     | miR-664        |
|              | miR-200a§    | miR-876-5p§  | miR-1953       | miR-297b-3p     | miR-2139       |
|              | miR-362-3p   | miR-9        | miR-139-5p     | miR-194         | miR-9          |
|              | miR-155§     | miR-1903     | miR-191        | miR-122         | miR-1953       |
|              | miR-741§     | miR-615-5p   | miR-210        | miR-133b        | miR-376a       |
|              | miR-100§     | miR-20a§     | miR-713        | miR-1187        | miR-1943       |
|              | miR-471      | (miR-20b)    | miR-2183       | miR-151-5p§     | miR-741§       |
|              | miR-210      | miR-101a     | miR-376b       | miR-24§         | miR-670        |
|              | miR-291a-3p  | miR-487b     | miR-330        | miR-540-3p      | miR-669e       |
|              | miR-450a-5p  | miR-135b     | miR-671-3p     | miR-296-3p      | miR-32         |
|              | miR-103§     | miR-322§     | miR-188-5p     | miR-546         |                |
|              | miR-487b     | miR-122      | miR-450a-5p    | miR-487b        |                |
|              | miR-667      | miR-323-3p   | miR-802        | miR-1903        |                |
|              | miR-876-5p§  |              | miR-1192       | miR-770-3p§     |                |
|              | miR-30e§     |              | miR-487b       |                 |                |
|              | miR-297b-3p  |              | miR-741§       |                 |                |
|              | miR-151-5p§  |              | miR-M1-1       |                 |                |
|              | miR-142-5p   |              | miR-686        |                 |                |
|              |              |              | miR-369-5p     |                 |                |
|              |              |              | miR-2133       |                 |                |
|              |              |              | miR-488        |                 |                |
